# Supplementary material
Source: publisher figshare collection journal article supplement (https://acs.figshare.com/ndownloader/files/13993613)
Supplement: Supplementary file 1 [file 13993613]

# Supporting Information

## Porous Organic Polymer Derived N-doped Porous Carbon Nanoparticles for Efficient Oxygen Reduction Electrocatalysis and Supercapacitors

Mei Yang <sup>a,b,\*</sup>, Xuan Long <sup>a</sup>, Huaming Li <sup>a</sup>, Hongbiao Chen <sup>a</sup>, Pingle Liu <sup>c\*</sup>

<sup>a</sup> College of Chemistry, Xiangtan University, Xiangtan 411105, Hunan Province, P. R. China

<sup>b</sup> Key Laboratory of Polymeric Materials & Application Technology of Hunan Province, Key Laboratory of Advanced Functional Polymeric Materials of College of Hunan Province, and Key Lab of Environment-Friendly Chemistry and Application in Ministry of Education, Xiangtan University, Xiangtan 411105, Hunan Province, P. R. China

<sup>c</sup> College of Chemical Engineering, Xiangtan University, Xiangtan 411105, Hunan Province, P. R. China

\*Corresponding author: Tel.: +86 731 58298005; Fax: +86 731 58293549.

E-mail address: [liupingle@xtu.edu.cn](mailto:liupingle@xtu.edu.cn) (P. Liu) [yangmei@xtu.edu.cn](mailto:yangmei@xtu.edu.cn) (M. Yang)

**Total number of pages: 17**

**Total number of tables: 5**

**Table S1:** Textural and electrochemical properties for TPOP-850, TPOP-900, and TPOP-950.

**Table S2:** C, N, O, and H contents evaluated from elemental analysis.

**Table S3:** C, N, O contents of TPOP-850, TPOP-900, and TPOP-950 evaluated from XPS.

**Table S4:** Summary of the optimal pyrolysis temperature, BET SSA, N content and the active N (graphitic-N + pyridinic-N) content of various metal-free ORR electrocatalysts and /or supercapacitor electrode materials derived from porous organic polymers.

**Table S5:** Summary of the electrochemical performances of various metal-free ORR electrocatalysts and /or supercapacitor electrode materials derived from porous organic polymers.

**Total number of schemes: 2**

**Scheme S1:** Schematic representation of the synthesis of DPT.

**Scheme S2:** Schematic representation of the synthesis of TPOP.

**Total number of figures: 9**

**Figure S1:** <sup>1</sup>H NMR spectrum of DPT in CDCl<sub>3</sub>.

**Figure S2:** MS spectrum of DPT.

**Figure S3:** FT-IR spectrum of the TPOP.

**Figure S4:** TGA curve of TPOT in nitrogen atmosphere at a heating rate of 10 °C min<sup>-1</sup>.

**Figure S5:** The XPS survey spectra (a) and high-resolution N 1s (b) spectra of TPOP-850. The XPS survey spectra (c) and high-resolution N 1s (d) spectra of TPOP-950.

**Figure S6:** RDE voltammograms of TPOP-850, TPOP-900, and TPOP-950 in O<sub>2</sub>-saturated 0.1 M KOH with a rotation speed of 1600 rpm (a). CV curves tested at a 5 mV s<sup>-1</sup> (b), and GC curves tested at a current density of 0.5 A g<sup>-1</sup> (c). The correlation of specific capacitances with current densities (d).

**Figure S7:** LSV curves of TPOP-900 with different counter electrode (a). LSV curves of TPOP-900 after cycling durability test with different counter electrode (b). Both were tested in O<sub>2</sub>-saturated 0.1 M KOH solution at 1600 rpm.

**Figure S8:** CV curves tested at a 5 mV s<sup>-1</sup> (a), GC curves tested at a current density of 0.5 A g<sup>-1</sup> (b), the correlation of specific capacitances with current densities (c), and Nyquist plot (d) of YP-50F and TPOP-900.

**Figure S9:** Cycling performance of YP-50F and TPOP-900.

## ***S1. Materials***

Pyridine, glacial acetic acid, nitric acid, Cyanuric chloride, 4-Cyanopyridine, hydrazine monohydrate, toluene, acetone, hydrochloric acid (HCl), potassium hydroxide (KOH), and ethanol were purchased from Shanghai Aladdin Industrial Co. (China).

## ***S2. Instruments***

<sup>1</sup>H NMR spectra was recorded with a 400 MHz Bruker AV-400 NMR spectrometer and chemical shifts were recorded in ppm units with TMS as the internal standard. Mass spectra were collected by a Microflex LRF MALDI-TOF mass spectrometer (Bruker Daltonics, USA).

Thermogravimetric analysis (TGA) was carried out on a STA 449C instrument with a heating rate of 10 °C min<sup>-1</sup> under a nitrogen flow rate of 100 mL min<sup>-1</sup>. Fourier transform infrared (FT-IR) spectra of samples prepared as KBr pellets were recorded on a Nicolet 6700 spectrophotometer.

Elemental analysis (EA) was conducted with a Perkin-Elmer CHN 2400 analyzer. The textural properties were characterized by N<sub>2</sub> sorption measurements at 77.3 K (Micromeritics TriStar II 3020). The specific surface area was obtained by Brunauer-Emmett-Teller (BET) method. The pore size distribution (PSD) was calculated from the adsorption branches of the isotherms using the DFT model. Scanning electron microscopy (SEM) images were recorded using S-4800 (JEOL) operated at an acceleration voltage of 10 kV. The transmission electron microscopy (TEM) images were recorded on a JEOL JEM-1011 transmission electron microscope (Japan) operating at 200 kV. The X-ray photoelectron spectroscopy (XPS) was performed on a K-Alpha 1063

photoelectron spectrometer (Thermo Fisher Scientific, England) with Al-K $\alpha$  X-ray radiation as the X-ray source for excitation. Raman spectra were recorded using a Renishaw via Raman spectrometer at 25 °C. The spectral were recorded over the range of 200–3200 cm<sup>-1</sup> using the 532 nm emission of an Ar ion laser source, and the resolution was 1 cm<sup>-1</sup>. Powder X-ray diffraction (XRD) was performed on a Rigaku D/Max 2500PC diffractometer.

### ***S3. ORR***

ORR tests were performed on a CHI760D electrochemical analyzer (Chenhua Instruments, Shanghai, China). Glassy carbon electrode (GC) with geometric area of 0.196 cm<sup>2</sup> was used as a substrate material. The ORR activity was then evaluated by cyclic voltammetry (CV) and linear sweep voltammetry (LSV) techniques on rotating disk electrode (RDE, AFE5T050GC, Pine Research Instrumentation, USA) in O<sub>2</sub>-saturated 0.1 M KOH solution. Rotating ring-disk electrode (RRDE, AFE7R9GCPT, Pine Research Instrumentation, USA) measurements were carried out to determine the four-electron selectivity. The disk electrode was scanned at a rate of 10 mV s<sup>-1</sup>, and the ring electrode potential was set to 0.5 V (vs. Ag/AgCl) in 0.1 M KOH. Methanol tolerant, CO poisoning and durability testing were conducted by chronoamperometric technique at the bias potential of -0.3 V (vs. Ag/AgCl) in O<sub>2</sub>-saturated 0.1 M KOH electrolyte at 1600 rpm. The Koutecky-Levich plots were obtained by linear fitting of the reciprocal rotating speed versus reciprocal current density collected at different potentials. The overall electron transfer numbers ( $n$ ) per oxygen molecule involved in a typical ORR process were calculated from the slopes of Koutecky-Levich plots using the following equation:

$$1/J = 1/J_k + 1/(B\omega^{1/2}) \quad (\text{Equation S1})$$

where  $J$  is the measured current density,  $J_k$  is the kinetic current density,  $\omega$  is the electrode rotating speed in rpm, and  $B$ , the reciprocal of the slope, which was determined from the slope of Koutecky-Levich plots based on Levich equation as followed:

$$B = 0.2nF\nu^{-1/6}C_{O_2}D_{O_2}^{2/3} \quad (\text{Equation S2})$$

where  $n$  is the number of electrons transferred per oxygen molecule,  $F$  is the Faraday constant (96485 C mol<sup>-1</sup>). The diffusion coefficient of oxygen  $D_{O_2}$  in 0.1 M KOH is  $1.9 \times 10^{-5}$  cm<sup>2</sup> s<sup>-1</sup>,  $\nu$  is the kinetic viscosity (0.01 cm<sup>2</sup> s<sup>-1</sup>), and the concentration of oxygen  $C_{O_2}$  is  $1.2 \times 10^{-3}$  mol L<sup>-1</sup>. The constant 0.2 is adopted when the rotating speed is in rpm.

The RRDE measurements were also conducted to determine peroxide species formed and the electron transfer number ( $n$ ). The disk electrode was scanned at a rate of 10 mV s<sup>-1</sup> and the ring electrode potential in the RRDE system was set to 0.5 V (vs. Ag/AgCl). The yield of peroxide species (%HO<sub>2</sub><sup>-</sup> in alkaline media, %H<sub>2</sub>O<sub>2</sub> in acidic media) and the number of electron transfer ( $n$ ) were calculated by the followed equations:

$$\%HO_2^- \text{ (or \%H}_2O_2\text{)} = 200 \times \frac{i_r / N}{i_r / N + i_d} \quad (\text{Equation S3})$$

$$n = 4 \times \frac{i_d}{i_r / N + i_d} \quad (\text{Equation S4})$$

where  $i_d$  and  $i_r$  are the disk and ring currents, respectively.  $N$  is the ring current collection efficiency, which was determined to be 37 % by the reduction of 10 mM K<sub>3</sub>[Fe(CN)<sub>6</sub>] in 0.1 M KNO<sub>3</sub>.

#### S4. Supercapacitors

The specific capacitance ( $C_g$ ) for three electrode test was calculated from the discharge curve according to the following equation:

$$C_g = I/(mdV/dt) \quad (\text{Equation S5})$$

where  $I$  (A) is the constant current,  $m$  is the mass of the active material and  $dV/dt$  is calculated from the slope obtained by fitting a straight line to the discharge curve from the end of the voltage drop to the end of the discharge process.

#### S5. Synthesis of DPT monomer

DPT was synthesized according to the procedure reported previously by Hupp group.<sup>1</sup> 4-Cyanopyridine (5.5 g, 52.8 mmol), hydrazine monohydrate (25 mL), concentrated HCl (5 mL), and deionized water (5 mL) were refluxed together for 2 h. The reaction was allowed to cool to room temperature. The precipitate (orange solid) was filtered and added to 200 mL of glacial acetic acid with stirring. A 35 mL of 30%  $\text{HNO}_3$  was added dropwise to the brown solution. The pink solid was collected by filtrations and recrystallized from pyridine to yield a purple solid, yield: 56%.

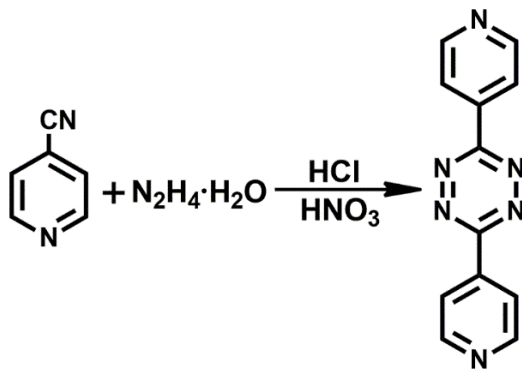

**Scheme S1.** Schematic representation of the synthesis of DPT.

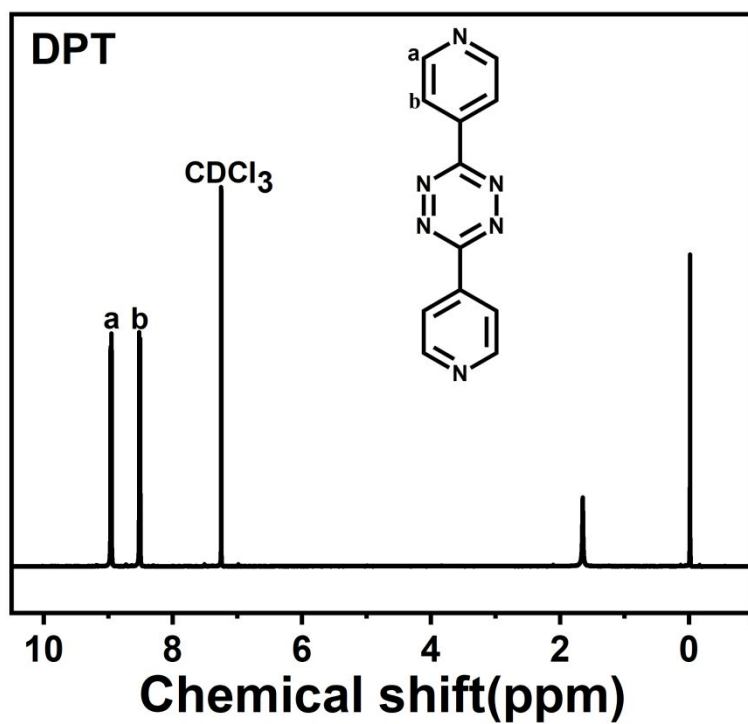

**Figure S1.** <sup>1</sup>H NMR spectrum of DPT in CDCl<sub>3</sub>.

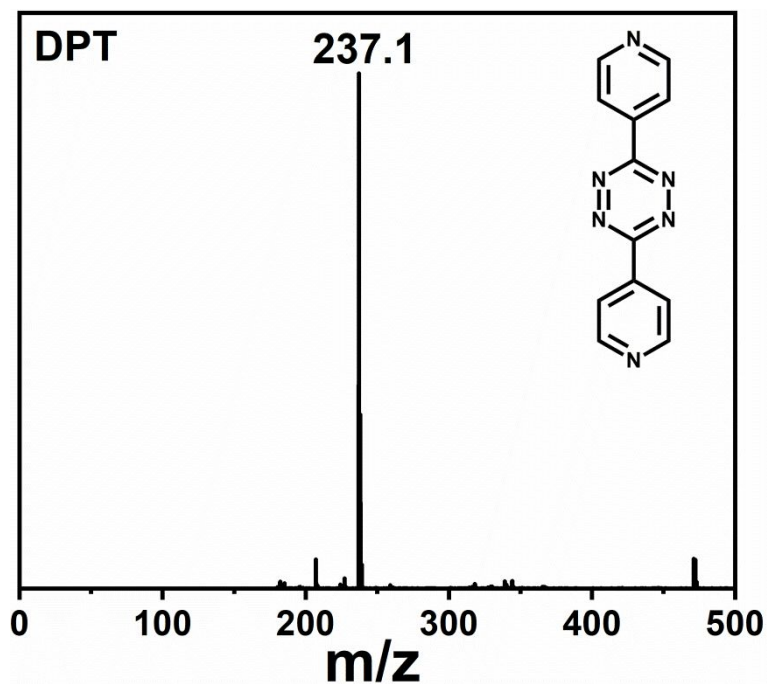

**Figure S2.** MS spectrum of DPT.

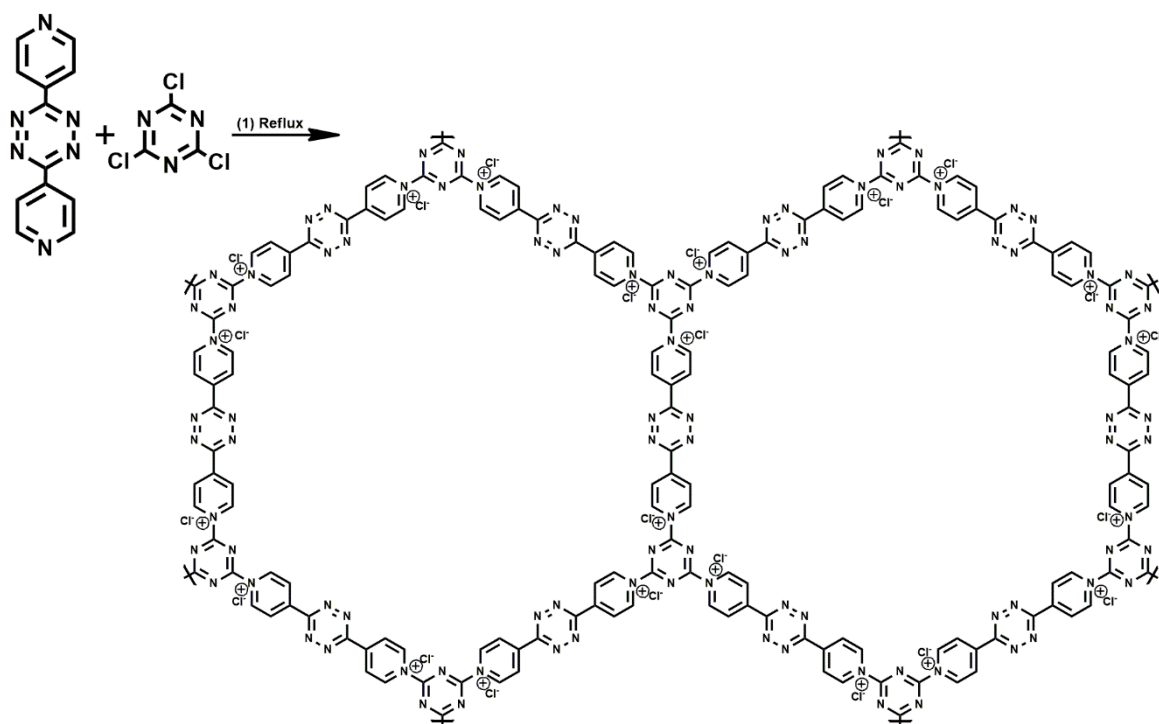

**Scheme S2.** Schematic representation of the synthesis of TPOP.

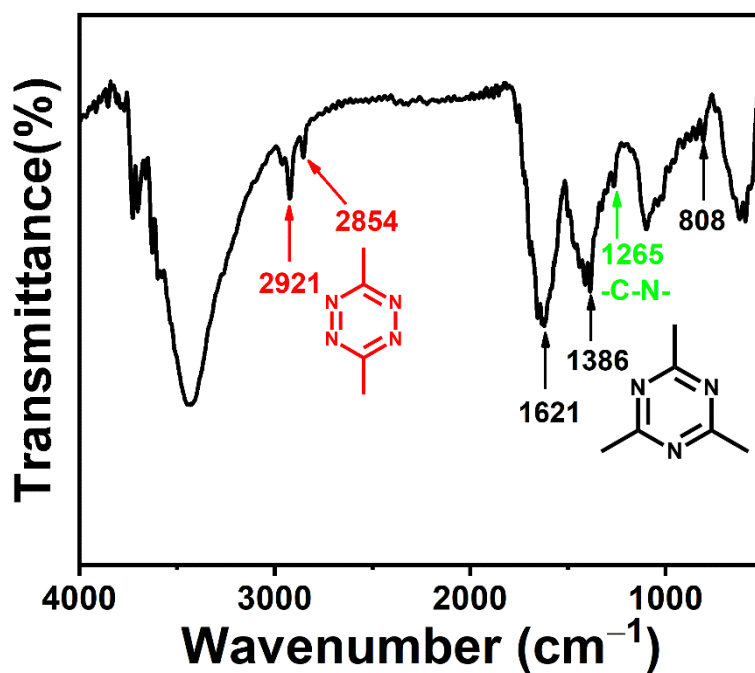

**Figure S3.** FT-IR spectrum of the TPOP. The peak at 1265  $\text{cm}^{-1}$  corresponds to the stretching vibration of C-N, while the peaks at 1621, 1386, and 808  $\text{cm}^{-1}$  correspond to the typical stretching modes of triazine heterocycle. The peak at 2921, 2854  $\text{cm}^{-1}$  correspond to the typical stretching modes of tetrazine heterocycle.

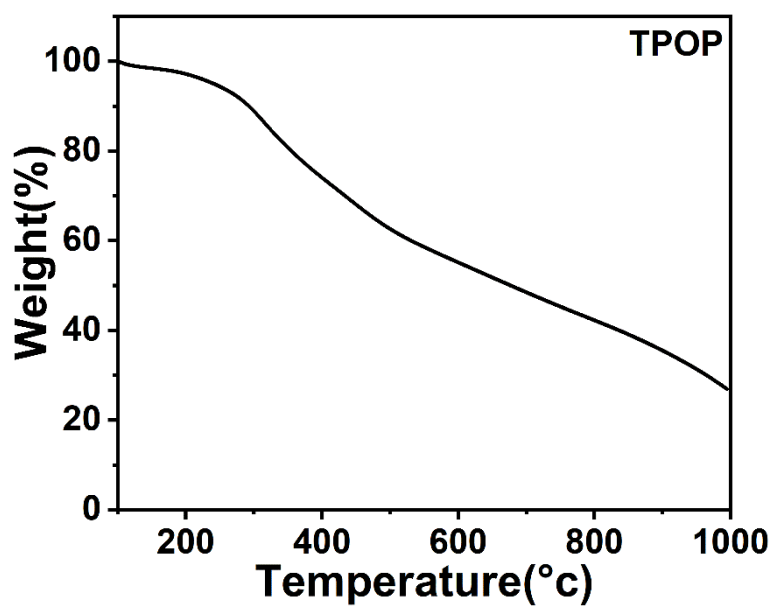

**Figure S4.** TGA curve of TPOP in nitrogen atmosphere at a heating rate of 10 °C min<sup>-1</sup>.

**Table S1.** Textural and electrochemical properties for TPOP-850, TPOP-900, and TPOP-950.

| Samples  | BET SSA (m <sup>2</sup> g <sup>-1</sup> ) |       |          | Pore volume (cm <sup>3</sup> g <sup>-1</sup> ) |       |          | $E_o^a$<br>(V) | $J_L^b$<br>(mA cm <sup>-2</sup> ) |
|----------|-------------------------------------------|-------|----------|------------------------------------------------|-------|----------|----------------|-----------------------------------|
|          | Total                                     | Micro | External | Total                                          | Micro | External |                |                                   |
| TPOP-850 | 531                                       | 518   | 12       | 0.36                                           | 0.32  | 0.10     | -0.004         | -5.00                             |
| TPOP-900 | 574                                       | 552   | 22       | 0.46                                           | 0.41  | 0.19     | 0.011          | -5.20                             |
| TPOP-950 | 740                                       | 716   | 23       | 0.50                                           | 0.45  | 0.16     | -0.007         | -4.95                             |

<sup>a</sup> ORR onset potential in O<sub>2</sub> saturated 0.1 M KOH solution with the rotation speed of 1600 rpm.

<sup>b</sup> Limiting current density in O<sub>2</sub> saturated 0.1 M KOH solution at -1.0 V (vs. Ag/AgCl).



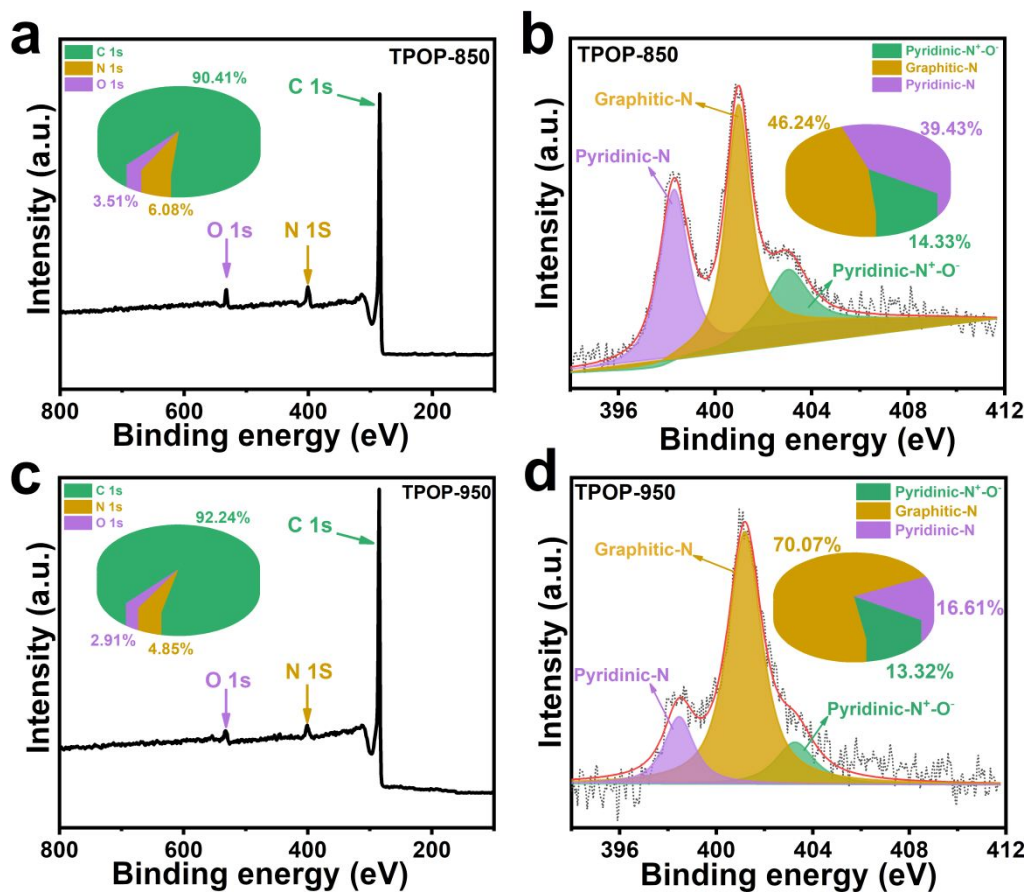

**Figure S5.** The XPS survey spectra (a) and high-resolution N 1s (b) spectra of TPOP-850. The XPS survey spectra (c) and high-resolution N 1s (d) spectra of TPOP-950.

**Table S2.** C, N, O, and H contents evaluated from elemental analysis.

| Samples  | Elemental Analysis <sup>a</sup> |          |                       |          |
|----------|---------------------------------|----------|-----------------------|----------|
|          | C (wt.%)                        | N (wt.%) | O <sup>b</sup> (wt.%) | H (wt.%) |
| TPOP-850 | 84.47                           | 9.75     | 3.28                  | 2.50     |
| TPOP-900 | 87.65                           | 7.51     | 2.97                  | 1.87     |
| TPOP-950 | 89.56                           | 5.48     | 2.80                  | 2.16     |

<sup>a</sup> Elemental analysis was carried out on the CHNS elemental analyzer (Vario EL, Elementar, Germany).

<sup>b</sup> The content of oxygen was calculated by the difference to 100%, neglecting the ash content.

**Table S3.** C, N, O contents of TPOP-850, TPOP-900, and TPOP-950 evaluated from XPS.

| Samples  | XPS                         |      |      |                                     |       |       |
|----------|-----------------------------|------|------|-------------------------------------|-------|-------|
|          | Elemental content<br>(at.%) |      |      | N configuration <sup>a</sup><br>(%) |       |       |
|          | C                           | N    | O    | N-P                                 | N-Q   | N-X   |
| TPOP-850 | 90.41                       | 6.08 | 3.51 | 39.43                               | 46.24 | 14.33 |
| TPOP-900 | 91.17                       | 5.63 | 3.20 | 27.99                               | 67.52 | 4.49  |
| TPOP-950 | 92.24                       | 4.85 | 2.91 | 16.61                               | 70.07 | 13.32 |

<sup>a</sup> Pyridinic-N (N-P), Graphitic-N (N-Q), Pyridinic-N<sup>+</sup>-O<sup>-</sup> (N-X).

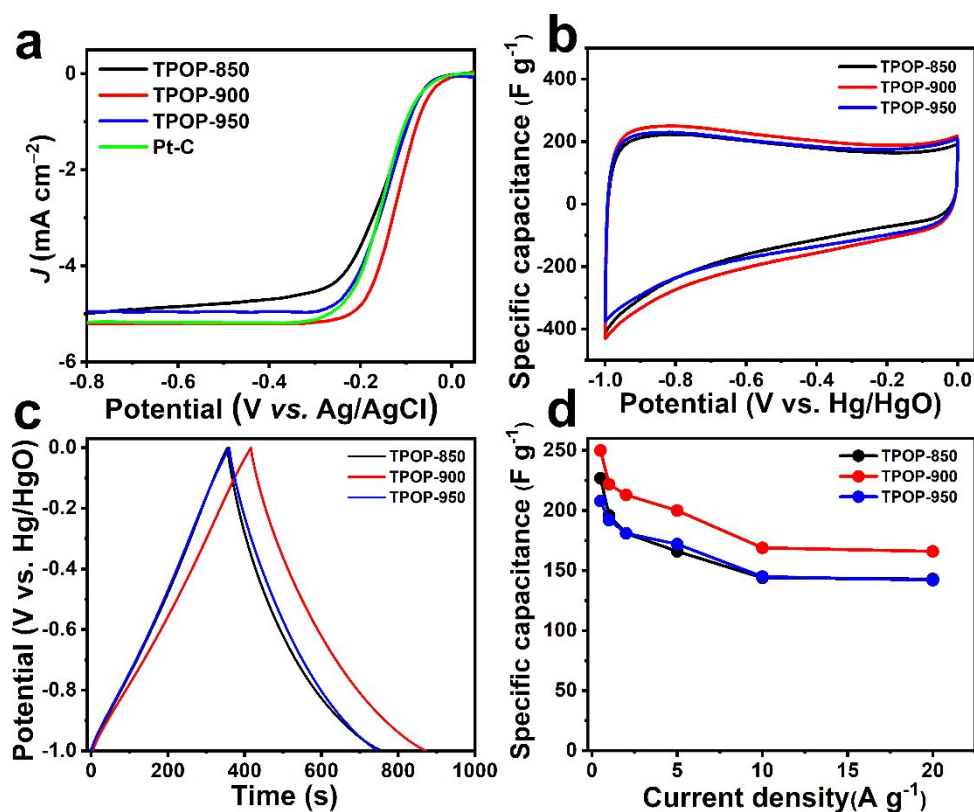

**Figure S6.** RDE voltammograms of TPOP-850, TPOP-900, and TPOP-950 in  $O_2$ -saturated 0.1 M KOH with a rotation speed of 1600 rpm (a). CV curves tested at a 5 mV s $^{-1}$  (b), and GC curves tested at a current density of 0.5 A g $^{-1}$  (c). The correlation of specific capacitances with current densities (d).

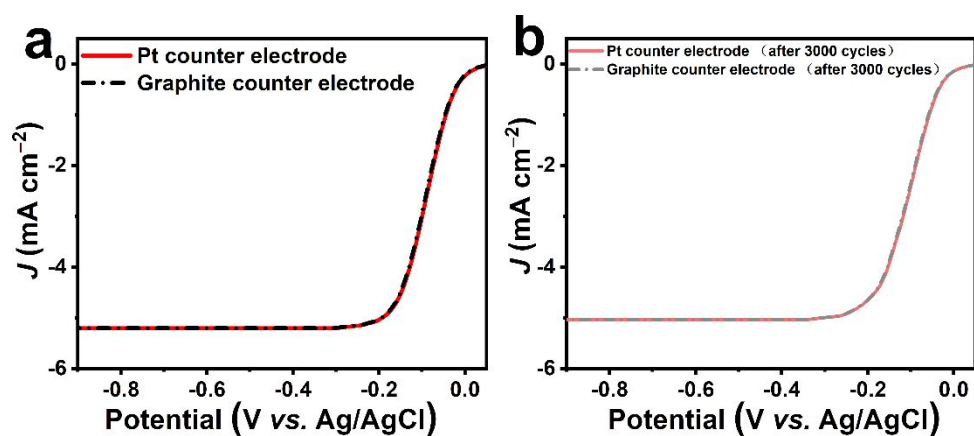

**Figure S7.** LSV curves of TPOP-900 with different counter electrode (a). LSV curves of TPOP-900 after cycling durability test with different counter electrode (b). Both were tested in  $O_2$ -saturated 0.1 M KOH solution at 1600 rpm.

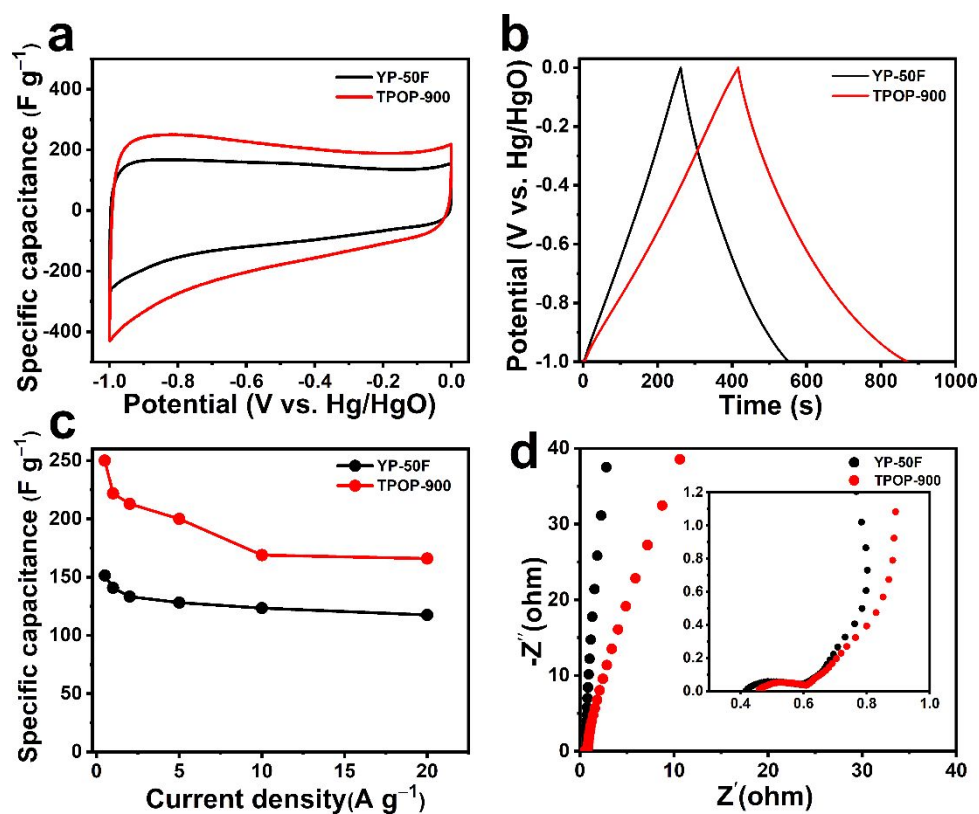

**Figure S8.** CV curves tested at a  $5 \text{ mV s}^{-1}$  (a), GC curves tested at a current density of  $0.5 \text{ A g}^{-1}$  (b), the correlation of specific capacitances with current densities (c), and Nyquist plot (d) of YP-50F and TPOP-900.

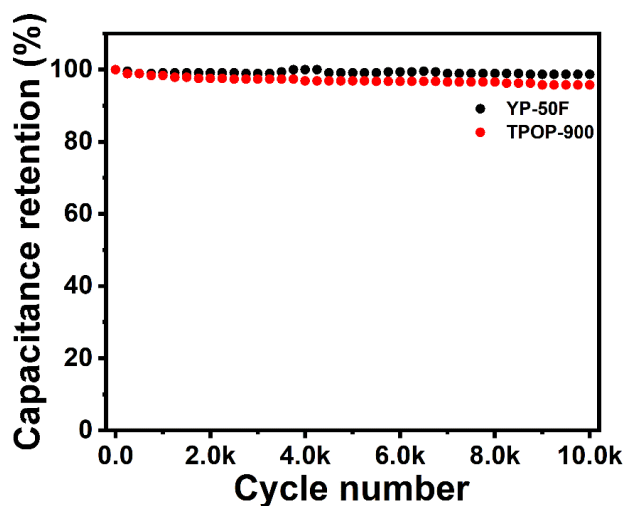

**Figure S9.** Cycling performance of YP-50F and TPOP-900.

**Table S4.** Summary of the optimal pyrolysis temperature, BET SSA, N content and the active N (graphitic-N + pyridinic-N) content of various metal-free ORR electrocatalysts and /or supercapacitor electrode materials derived from porous organic polymers.

| Precursors                                         | Pyrolysis<br>temperature<br>(°C) | SSA BET<br>(m <sup>2</sup> g <sup>-1</sup> ) | N content<br>(at.%) | Graphitic-N<br>+pyridinic-N<br>(%) | Ref.      |
|----------------------------------------------------|----------------------------------|----------------------------------------------|---------------------|------------------------------------|-----------|
| Poly(triazine-thiophene-benzene)                   | 800                              | 700                                          | 1.15                | ~89.0                              | [2]       |
| Poly(trianiline-dihydroxyterephthalaldehyde)       | 1000                             | 1160                                         | 1.86                | 97.67                              | [3]       |
| Poly(o-methylaniline)                              | 900                              | 727.1                                        | 2.00                | 60.0                               | [4]       |
| Poly(triformylbenzene-phenylenediamine)            | 800                              | 525                                          | 4.73                | ~85.0                              | [5]       |
| Polyisocyanurate                                   | 1000                             | 889                                          | 1.70                | ~45.0                              | [6]       |
| Polyaniline-polypyrrole                            | 900                              | 645.3                                        | 3.50                | 91.0                               | [7]       |
| Poly-terephthalonitrile                            | 600                              | 2570                                         | 4.73                | 73.01                              | [8]       |
| Poly(bromo-phenyl)-triazine                        | 950                              | 569                                          | 3.31                | ~88.0                              | [9]       |
| (Phytic acid)-doped polypyrrole                    | 900                              | 305                                          | 3.56                | 83.44                              | [10]      |
| Triazine-based polypyrrole                         | 900                              | 779                                          | 3.02                | 65.03                              | [11]      |
| Poly-melamine (amino trimethylene phosphonic acid) | 900                              | 743                                          | 3.48                | 54.38                              | [12]      |
| Tetrazine-containing porous organic polymer        | 900                              | 574                                          | 5.63                | 95.51                              | This work |

**Table S5.** Summary of the electrochemical performances of various metal-free ORR electrocatalysts and /or supercapacitor electrode materials derived from porous organic polymers.

| Precursors                                         | Cycling<br>performance<br>(cycle number) | $E_o^a$<br>(V vs Ag/AgCl) | $J_L^b$<br>(mA cm <sup>-2</sup> ) | $C_g^c$<br>(F g <sup>-1</sup> ) | Ref.      |
|----------------------------------------------------|------------------------------------------|---------------------------|-----------------------------------|---------------------------------|-----------|
| Poly(triazine-thiophene-benzene)                   | 83.0% (10000)                            | -0.005                    | 4.10                              | 151                             | [2]       |
| Poly(trianiline-dihydroxyterephthalaldehyde)       | /                                        | 0                         | 7.20                              | /                               | [3]       |
| Poly(o-methylaniline)                              | 93.0% (3000)                             | 0.016                     | 4.10                              | 182                             | [4]       |
| Poly(triformylbenzene-phenylenediamine)            | 98.0% (1500)                             | /                         | /                                 | 211                             | [5]       |
| Polyisocyanurate                                   | /                                        | -0.115                    | 8.00                              | /                               | [6]       |
| Polyaniline-polypyrrole                            | /                                        | 0.011                     | 4.40                              | /                               | [7]       |
| Poly-terephthalonitrile                            | /                                        | -0.105                    | 4.90                              | /                               | [8]       |
| Poly(bromo-phenyl)-triazine                        | /                                        | 0                         | 5.00                              | 180                             | [9]       |
| (Phytic acid)-doped polypyrrole                    | /                                        | 0                         | 5.10                              | /                               | [10]      |
| Triazine-based polypyrrole                         | /                                        | 0.007                     | 5.05                              | /                               | [11]      |
| Poly-melamine (amino trimethylene phosphonic acid) | /                                        | -0.045                    | 5.50                              | /                               | [12]      |
| Tetrazine-containing porous organic polymer        | 95.7% (10000)                            | 0.011                     | 5.20                              | 222                             | This work |

<sup>a</sup> ORR onset potential in O<sub>2</sub> saturated 0.1 M KOH solution with the rotation speed of 1600 rpm.

<sup>b</sup> Limiting current density in O<sub>2</sub> saturated 0.1 M KOH solution at -1.0 V (vs. Ag/AgCl).

<sup>c</sup> The specific capacitances at 1 A g<sup>-1</sup> in 6 M KOH electrolyte.

## References

- [1] Farha, O. K.; Malliakas, C. D.; Kanatzidis, M. G.; Hupp, J. T.; Control over catenation in metal-organic frameworks via rational design of the organic building block. *J. Am. Chem. Soc.* **2009**, 132 (3), 950–952, DOI 10.1021/ja909519e.
- [2] Bhosale, M. E.; Illathvalappil, R.; Kurungot, S.; Krishnamoorthy, K.; Conjugated porous polymers as precursors for electrocatalysts and storage electrode materials. *Chem. Commun.* **2016**, 52 (2), 316–318, DOI 10.1039/C5CC08148C.
- [3] Xu, Q.; Tang, Y.; Zhang, X.; Oshima, Y.; Chen, Q.; Jiang, D.; Template conversion of covalent organic frameworks into 2D conducting nanocarbons for catalyzing oxygen reduction reaction. *Adv. Mater.* **2018**, 30 (15), 1706330, DOI 10.1002/adma.201706330.
- [4] He, Y.; Han, X.; Du, Y.; Song, B.; Xu, P.; Zhang, B.; Bifunctional nitrogen-doped microporous carbon microspheres derived from poly (o-methylaniline) for oxygen reduction and supercapacitors. *ACS Appl. Mater. Interfaces* **2016**, 8 (6), 3601–3608, DOI 10.1021/acsami.5b07865.
- [5] Liu, X.; Zhou, L.; Zhao, Y.; Bian, L.; Feng, X.; Pu, Q.; Hollow, spherical nitrogen-rich porous carbon shells obtained from a porous organic framework for the supercapacitor. *ACS Appl. Mater. Interfaces* **2013**, 5 (20), 10280–10287, DOI 10.1021/am403175q.
- [6] Chandrasekaran, N.; Selvakumar, K.; PremKumar, V.; Muthusamy, S.; Senthil Kumar, S. M.; Thangamuthu, R.; Dual heteroatom-doped carbon monoliths derived from catalyst-free preparation of porous polyisocyanurate for oxygen reduction reaction. *ACS Sustainable Chem. Eng.* **2018**, 6 (7), 9094–9103, DOI 10.1021/acssuschemeng.8b01440.
- [7] He, J.; He, Y.; Fan, Y.; Zhang, B.; Du, Y.; Wang, J.; Xu, P.; Conjugated polymer-mediated synthesis of nitrogen-doped carbon nanoribbons for oxygen reduction reaction. *Carbon*, **2017**, 124,

630–636, DOI 10.1016/j.carbon.2017.08.081.

[8] Zhang, L. S.; Liu, R.; Ning, J.; Zhang, G.; Zhi, L.; Bottom-up construction of triazine-based frameworks as metal-free electrocatalysts for oxygen reduction reaction. *Adv. Mater.* **2015**, 27 (20), 3190–3195, DOI 10.1002/adma.201500863.

[9] Xiang, Z.; Cao, D.; Huang, L.; Shui, J.; Wang, M.; Dai, L.; Nitrogen-doped holey graphitic carbon from 2D covalent organic polymers for oxygen reduction. *Adv. Mater.* **2014**, 26 (20), 3315–3395, DOI 10.1002/adma.201306328.

[10] Zhang, Z.; Sun, J.; Dou, M.; Ji, J.; Wang, F.; Nitrogen and phosphorus codoped mesoporous carbon derived from polypyrrole as superior metal-free electrocatalyst toward the oxygen reduction reaction. *ACS Appl. Mater. Interfaces* **2017**, 9 (19), 16236–16242, DOI 10.1021/acsami.7b03375.

[11] Yang, M.; Liu, Y.; Chen, H.; Yang, D.; Li, H.; Porous N-doped carbon prepared from triazine-based polypyrrole network: a highly efficient metal-free catalyst for oxygen reduction reaction in alkaline electrolytes. *ACS Appl. Mater. Interfaces* **2016**, 8 (42), 28615–28623, DOI 10.1021/acsami.6b09811.

[12] Jiang, H.; Wang, Y.; Hao, J.; Liu, Y.; Li, W.; Li, J.; N and P co-functionalized three-dimensional porous carbon networks as efficient metal-free electrocatalysts for oxygen reduction reaction. *Carbon* **2017**, 122, 64–73, DOI 10.1016/j.carbon.2017.06.043.
